Title: The regulation of a pigmentation gene in the formation of complex color patterns in

*Drosophila abdomens*

Komal K. B. Raja<sup>1</sup>, Mujeeb, O. Shittu<sup>2</sup>, Peter M. E. Nouhan<sup>3</sup>, Tessa. E. Steenwinkel<sup>2</sup>, Evan A.

Bachman<sup>4</sup>, Prajakta P. Kokate<sup>2</sup>, Alexander H. McQueeney<sup>5</sup>, Elizabeth A. Mundell<sup>6</sup>, Alexandri A.

Armentrout<sup>2</sup>, Amber M. Nugent<sup>2</sup> & Thomas Werner<sup>2\*</sup>

Affiliations:

<sup>1</sup> Department of Pathology & Immunology, Baylor College of Medicine, One Baylor Plaza,

Houston, Texas, 77054.

<sup>2</sup> Department of Biological Sciences, Michigan Technological University, 1400 Townsend Dr.,

Houghton, MI 49931, United States of America

<sup>3</sup> McCourt School of Public Policy, Georgetown University, 37th and O Streets, N.W.,

Washington D.C. 20057, United States of America

<sup>4</sup> Michigan State University, College of Human Medicine, 965 Fee Rd. A110, East Lansing, MI

48824, United States of America

<sup>5</sup> School of Medicine, Eberhard Karls University of Tübingen, Geschwister-Scholl-Platz, 72074

Tübingen, Germany

<sup>6</sup> School of Technology, Michigan Technological University, 1400 Townsend Dr., Houghton, MI

49931, United States of America

\* Corresponding author: Thomas Werner; e-mail: [twerner@mtu.edu](mailto:twerner@mtu.edu)

# **Abstract**

**Changes in *cis*-regulatory modules (CRMs) that control developmental gene expression patterns have been implicated in the evolution of animal morphology<sup>1-6</sup>. However, the genetic mechanisms underlying complex morphological traits remain largely unknown. Here we investigated the molecular mechanisms that induce the pigmentation gene *yellow* (*y*) in a complex spot and shade pattern on the abdomen of the quinaria group species *Drosophila guttifer*. We show that the *y* expression pattern is controlled by only one CRM, which contains a stripe-inducing CRM at its core. We identified several developmental genes that may collectively interact with the CRM to orchestrate the patterning in the pupal abdomen of *D. guttifer*. We further show that the core CRM is conserved among *D. guttifer* and the closely related quinaria group species *Drosophila deflecta*, which displays a similarly spotted abdominal pigment pattern. Our data suggest that besides direct activation of patterns in distinct spots, abdominal spot patterns in *Drosophila* species may have evolved through partial repression of an ancestral stripe pattern, leaving isolated spots behind. Abdominal pigment patterns of extant quinaria group species support the partial repression hypothesis and further emphasize the modularity of the *D. guttifer* pattern.**

How complex morphological features develop and evolve is a question of foremost importance in biology. To address this question, we identified genes underlying abdominal pigmentation pattern development in *Drosophila guttifer* (*D. guttifer*). The abdomen is decorated with six rows of black spots that run along the anterior-posterior axis, divided by a dark dorsal midline shade. This color pattern shows four sub-patterns: a dorsal, median, and lateral pair of spot rows,

plus the dorsal midline shade (Fig. 1a, b). *D. guttifera* belongs to the quinaria species group, whose members display highly diverse abdominal pigmentation patterns<sup>7,8</sup>. While *D. guttifera* shows the most complex pattern of this group, most other quinaria group species lack at least one of the four sub-patterns, illustrating the pattern modularity among species. Interestingly, the stripe patterns of certain species often separate into spots<sup>7,8</sup>. In this study, we show that the abdominal pigment patterns of quinaria group members may be formed by a combination of localized spot induction and partial stripe repression.

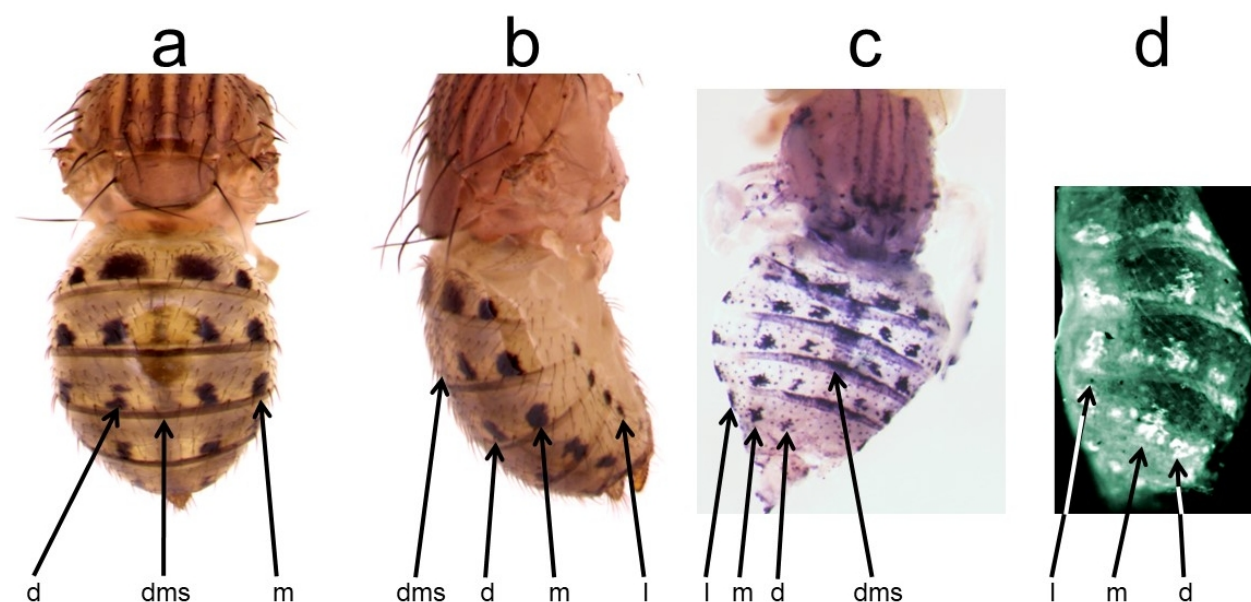

**Figure 1: The *D. guttifera* abdominal color pattern is modular.** a, Adult, dorsal view. b, Adult, lateral view. c, *yellow* mRNA expression pattern in a pupal abdomen. d, Yellow protein expression pattern in a pupal abdomen. dms = dorsal midline shade, d = dorsal, m = median, l = lateral spot rows.

We focused on the regulation of the *yellow* (*y*) gene, which is required for the formation of black melanin in insects<sup>8-14</sup>. Several *y* gene CRMs have been identified in various *Drosophila* species,

and changes in these CRMs and/or in the deployment of *trans*-factors that regulate *y* gene expression have been implicated in the diversification of wing and body pigment patterns<sup>12,15-19</sup>. In *D. guttifer* pupae, *y* gene expression and the location of the Y protein accurately prefigured the complex adult abdominal pigment pattern (Fig. 1c, d). In order to identify putative upstream activators of *y*, we performed an *in situ* hybridization screen for genes expressed in ways prefiguring the *y* gene expression pattern. We found that *wingless* (*wg*) expression precisely foreshadowed the six rows of black spots (Fig. 2b). Additionally, *decapentaplegic* (*dpp*) expression foreshadowed the dorsal and median pairs of spot rows (Fig. 2c), while *abdominal-A* (*abd-A*) expression correlated with the lateral pair of spot rows and the dorsal midline shade (Fig. 2d, e). *hedgehog* (*hh*) and *zerknüllt* (*zen*) were additionally expressed along the dorsal midline of the abdomen (Fig. 2f, g). Thus, the activation of the *D. guttifer* color pattern appears to be induced in a modular fashion, which is in agreement with our observation that abdominal pigmentation patterns within the quinaia group are variations of the *D. guttifer* pattern ground plan (Fig. 3). This situation is reminiscent of the wing pattern ground plan in nymphalid butterflies<sup>20,21</sup>.

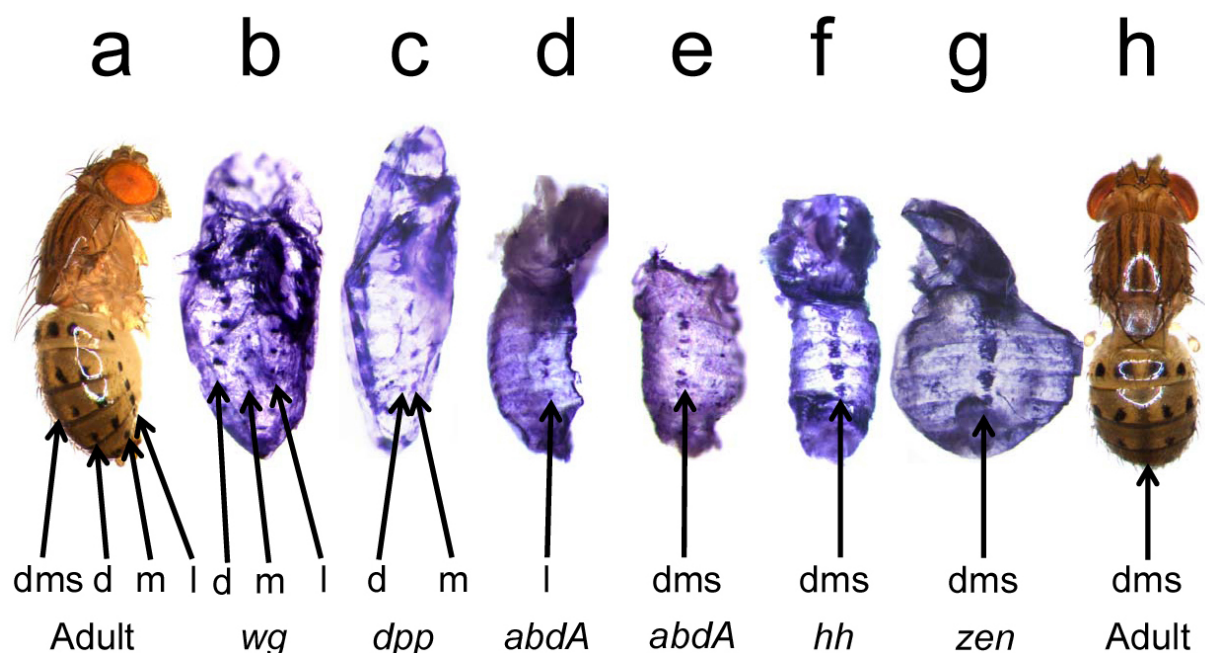

**Figure 2: The mRNA expression patterns of five developmental genes foreshadow the *yellow* expression pattern.** a, Adult, lateral view. b-g, *in situ* hybridizations in pupal abdomens. h, Adult, dorsal view. dms = dorsal midline shade, d = dorsal, m = median, l = lateral spot rows.

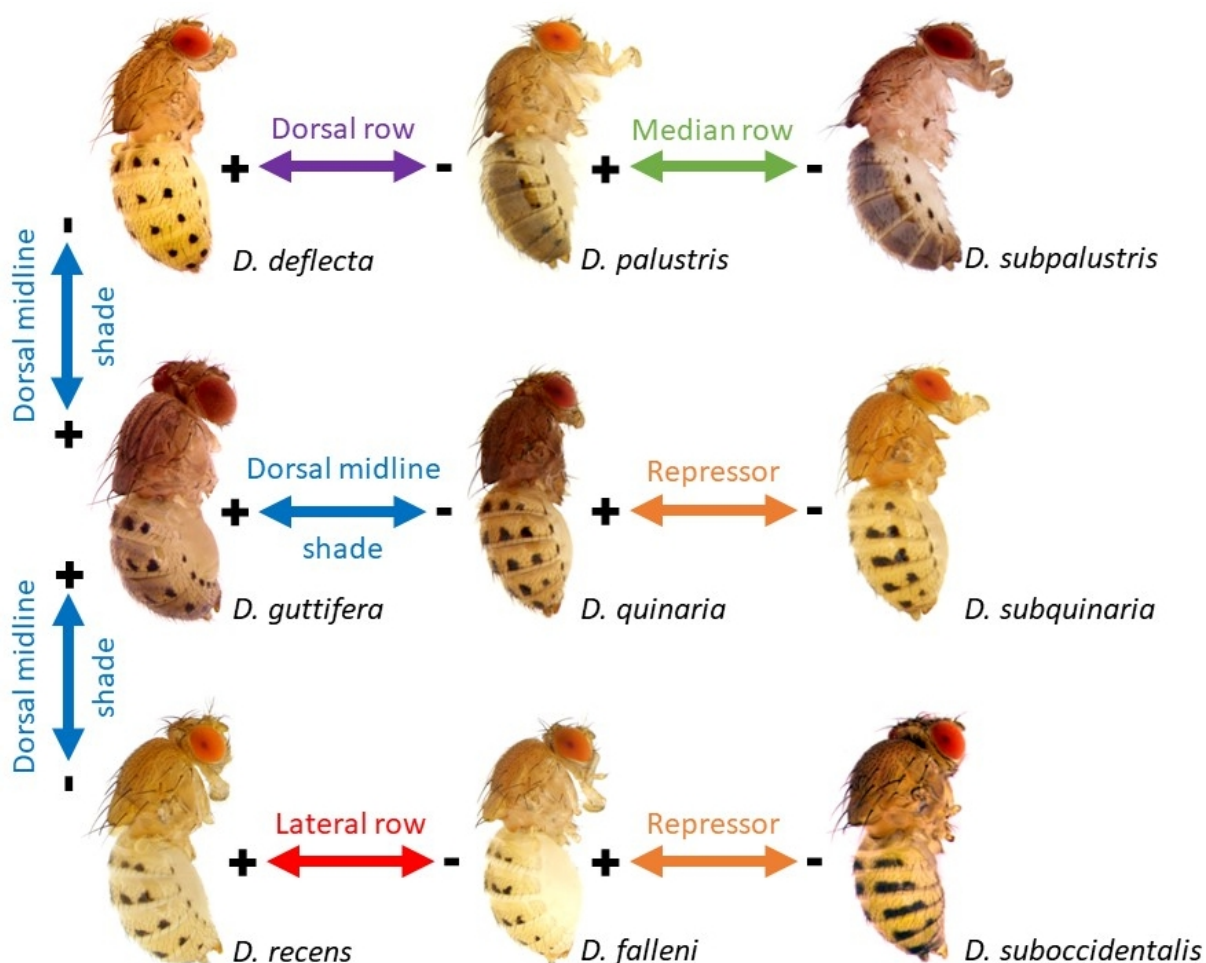

**Figure 3: Deviations from the *D. guttifer* ground plan create the diversity of quinaria**

**species' abdominal color patterns.** + = gain, - = loss of a pattern element. "Repressor" suggests stripes may be broken into spots by repressors of pigmentation and vice versa. The illustration does not imply any evolutionary direction; it solely illustrates the modularity of these complex patterns.

We hypothesized that the developmental candidate genes may activate the *y* gene through four CRMs, each controlling one sub-pattern to assemble the complete melanin pattern. We searched for these CRMs by transforming *D. guttifer* with *DsRed* reporter constructs containing non-



coding fragments of the 42 kb *D. guttifera* *y* gene locus<sup>12</sup> (Extended Data Fig. 1). Surprisingly, only one 953 bp fragment from the *y* intron, the *gut y spot* CRM, drove expression closely resembling all six spot rows on the developing abdomen (Fig. 4). To isolate possible sub-pattern-inducing CRMs, we subdivided the *gut y spot* CRM into 8 partially overlapping sub-fragments. Unexpectedly, the 636 bp left sub-fragment displayed horizontal stripe expression along the posterior edges of each abdominal segment, while the 570 bp right fragment was inactive (#1 & #2, Fig. 4). Further dissection of this CRM revealed a 259 bp sub-fragment, which contained the minimal *gut y core stripe* CRM with some additional dorsal midline shade activity (#7, Fig. 4). These results suggest that the *D. guttifera* spots may have evolved from an ancestral stripe pattern that became partially repressed to isolate the spots. Currently, we cannot offer any direct evidence for specific candidate repressor genes. Neither the *in situ* hybridization experiments nor the bioinformatics analyses, using Jaspar, resulted in putative pigment stripe repressors. Although we identified 24 Engrailed (En)-binding sites and 19 Homothorax (Hth)-binding sites in the *gut y spot* CRM (both are known repressors of pigmentation in *Drosophila*<sup>15,22</sup>), these sites were not enriched in the right half of the CRM, as we would have expected. However, our transcription factor binding site analysis of the *gut y spot* CRM sequence revealed putative transcription factor binding sites for most of the developmental genes that we identified as potential activators in our *in situ* hybridization screen, except for *hh*. This suggests that localized spot activation by these developmental factors contributes to the formation of the pattern.

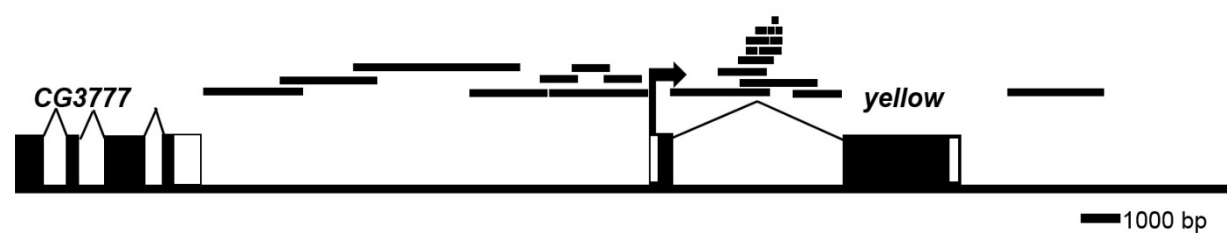

Extended Data Fig. 1

**Extended Data Fig. 1: The *y* gene locus.** The horizontal bars indicate the DNA fragments of the *D. guttifera* *y* gene that were tested in transgenic *D. guttifera* for regulatory activity.

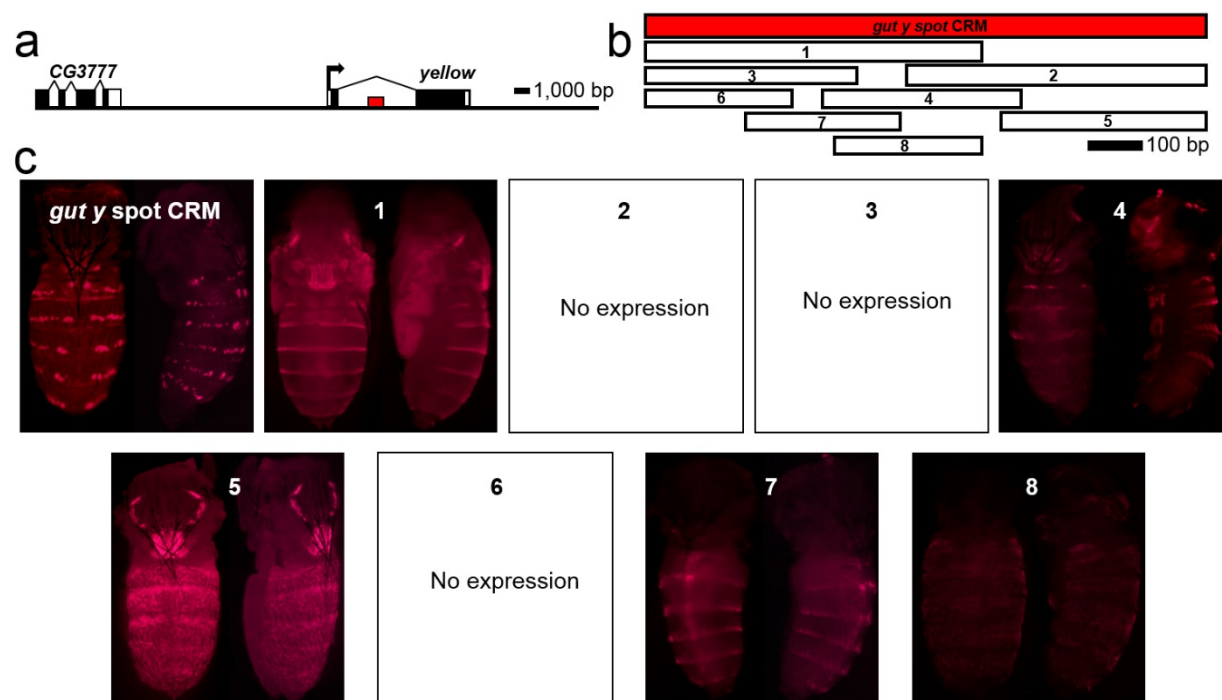

**Fig. 4: The *gut y spot CRM* is harbored within the *y* intron.** a, The *y* gene locus. The red bar indicates the relative position of the *gut y spot CRM*. b, Sub-dividing the *gut y spot CRM* revealed horizontal stripes on each abdominal segment. The white bars (1-8) represent sub-fragments of the *gut y spot CRM*, and the corresponding pupal *DsRed* expression patterns in transgenic *D. guttifera* are shown.

Next, we asked whether the abdominal pigment spot pattern of a species closely related to *D. guttifera* shares a similar developmental basis. We thus performed *in situ* hybridization experiments in *Drosophila deflecta* (*D. deflecta*). This species displays six longitudinal spot rows



on its abdomen, but lacks the dorsal midline shade (Extended Data Fig. 2a, b). As in *D. guttifera*, *y* mRNA in *D. deflecta* pupal abdomens was expressed in six rows of spots, except along the dorsal midline (Extended Data Fig. 2c). Similarly, *wg* foreshadowed all six rows of spots, while *dpp* expression matched all but the lateral spot rows (Extended Data Fig. 3b, c). In contrast to the *D. guttifera* results, *abd-A*, *hh*, and *zen* were absent along the dorsal midline, which is in agreement with the lack of pigment in *D. deflecta* adults (Extended Data Fig. 3d, e, f, g). However, *abd-A* expression was not detectable where the lateral spot rows will form (Extended Data Fig. 3d), suggesting that these particular spots are controlled differently in *D. deflecta*. We next cloned the 938 bp orthologous *defy spot* CRM and transformed it into *D. guttifera*, using the *DsRed* reporter assay. The *defy spot* CRM drove faint dorsal spot row and stripe expression, especially along the dorsal spots (Extended Data Fig. 4). We further subdivided the *defy spot* CRM into 8 sub-fragments and identified a minimal *defy core stripe* CRM (288 bp) (#7, Extended Data Fig. 4). This sub-fragment drove a striped pattern, but without the dorsal midline shade activity seen in the *D. guttifera* minimal *gut y core stripe* CRM (#7, Fig. 4). We further transformed the *gut y spot* and *defy spot* CRMs including all sub-fragments into *D. melanogaster* to test if *D. melanogaster* *trans*-factors can bind to and activate these two quinaria group species' spot CRMs. As a result, none of the reporter constructs showed any expression (data not shown). This suggests that the hypothetical ancestral stripe pattern of the quinaria group and the pigment stripes found on the *D. melanogaster* abdominal tergites<sup>23</sup> have evolved independently by changes in *trans*. As the spot CRMs from *D. guttifera* and *D. deflecta* are not orthologous to any sequences within the *D. melanogaster y* locus, changes in *cis* have also contributed to the diversification of pigment patterns between *D. melanogaster* and the quinaria species group.

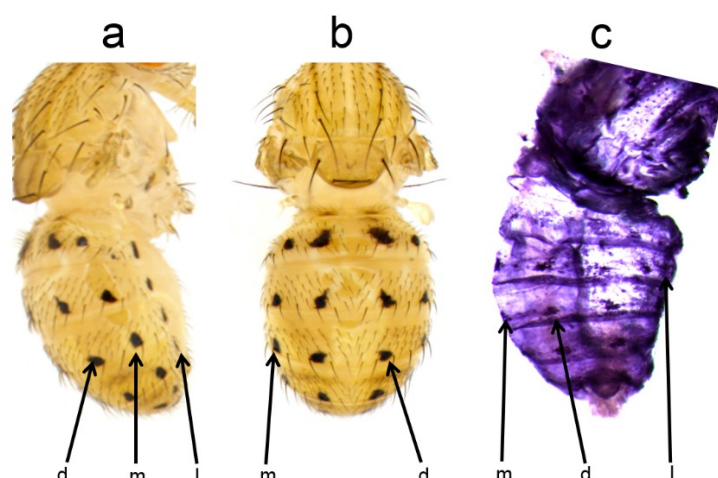

Extended Data Fig. 2

**Extended Data Fig. 2:** The *y* gene expression pattern in *D. deflecta* foreshadows the black spot pattern on the adult abdomen. a, Adult lateral view. b, Adult dorsal view. c, *y* mRNA in the pupal epidermis. d = dorsal, m = median, l = lateral.

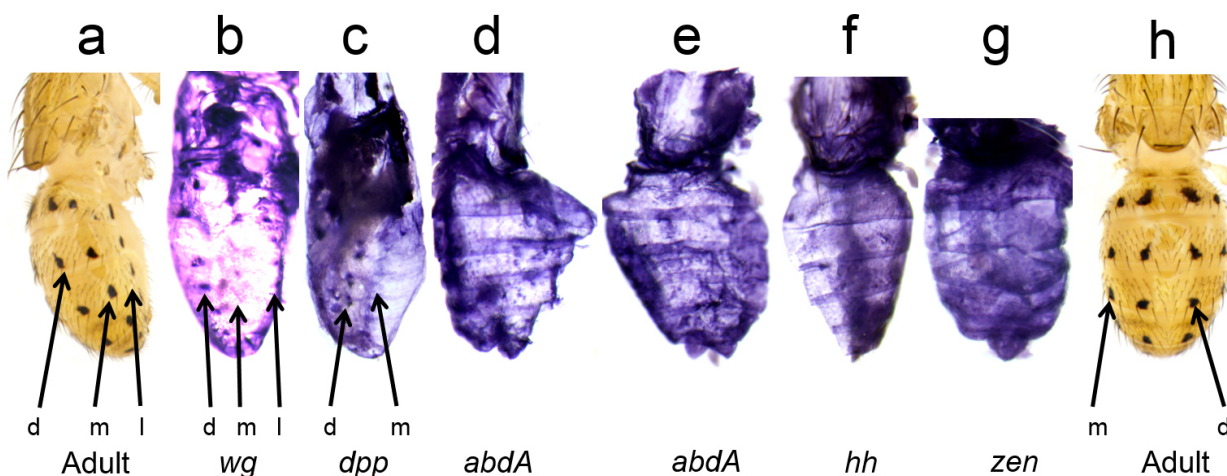

Extended Data Fig. 3

**Extended Data Fig. 3:** Developmental gene expression patterns in *D. deflecta* foreshadow distinct subsets of the adult abdominal color pattern. a, h, Adult, lateral view. b-g, Pupal *in situ* hybridizations. d = dorsal, m = median, l = lateral.

Extended Data Fig. 4

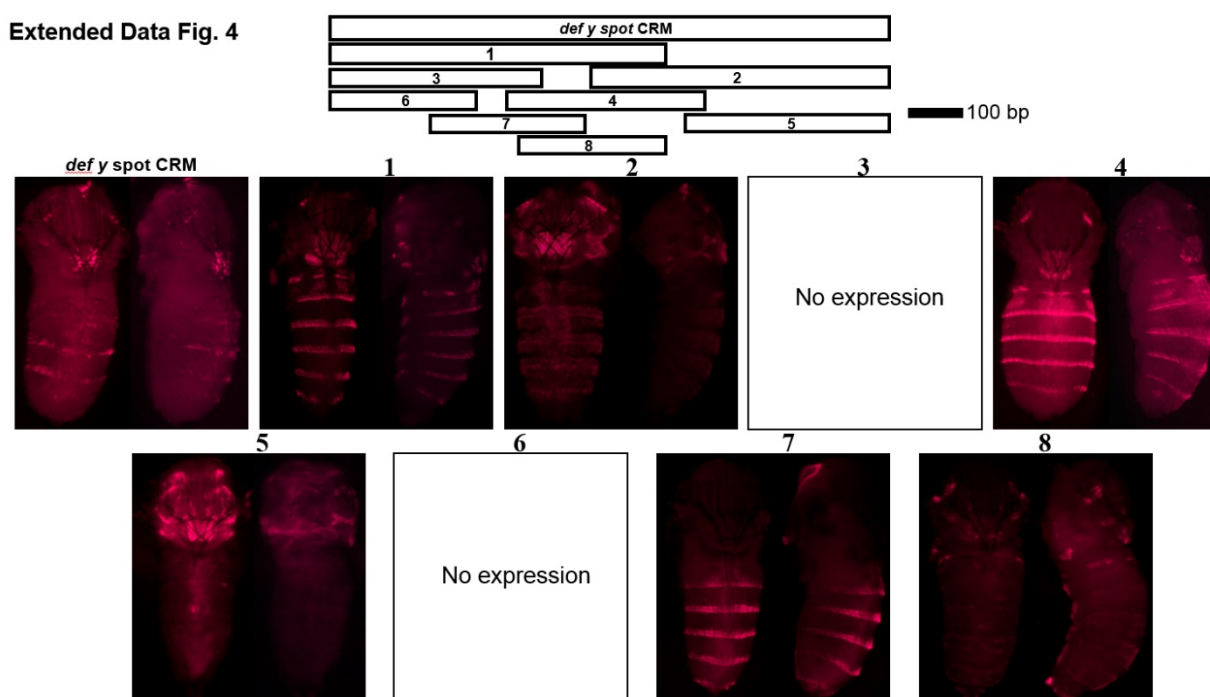

**Extended Data Fig. 4: The orthologous *D. deflecta* region (*def y spot CRM*) analyzed in transgenic *D. guttifera*.** The white bars (1-8) indicate sub-fragments of the *def y spot CRM* that were tested for reporter activity. The corresponding DsRed reporter expression patterns in developing pupae are shown.

In contrast to the *D. guttifera* wing spot pattern<sup>12</sup>, the abdominal pigment pattern develops in the absence of visible physical landmarks. *wg*, *dpp*, and *hh* are homologous to known proto-oncogenes in humans<sup>24</sup>, while *zen* and *abdA* are Hox genes. The abdominal color pattern of *D. guttifera* appears to be regulated by multiple developmental pathways consisting of activators and repressors acting in parallel, possibly targeting pigmentation genes other than *y* as well<sup>18,19,25,26</sup>. Further evidence for the repression of stripes can be seen in *Drosophila falleni*'s intraspecific pigment variation, another member of the quinaria species group (Extended Data Fig. 5). Our multi-pathway model fits well with the observation that the abdominal pattern

variation presented by quinaria group members is largely due to modular derivations from the *D. guttifera* ground plan (Fig. 3). This scenario is reminiscent of the modularity found in butterfly wing patterns. Because insects use similar genes for color pattern development<sup>21,27-30</sup>, the quinaria group may serve as a valuable model to understand insect color pattern evolution. Future work should aim to manipulate the genes involved in pigmentation to test if they interact according to the reaction-diffusion model, as predicted by Alan Turing<sup>31</sup>.

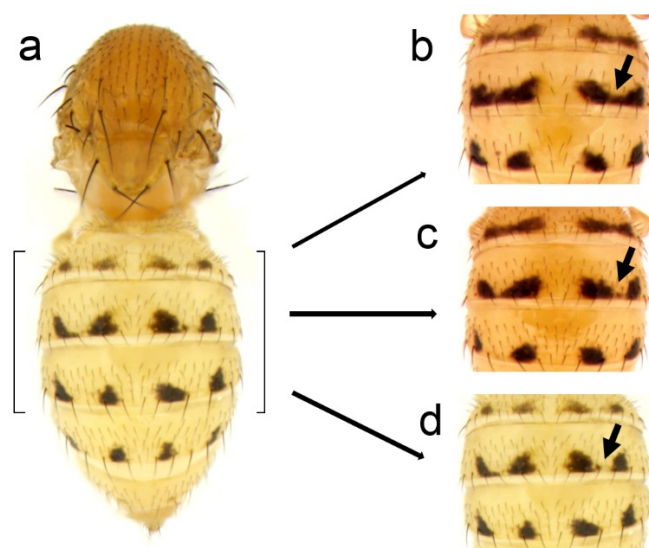

Extended Data Fig. 5

**Extended Data Fig. 5: The abdominal pigment stripes of *D. falleni* break down into pigment spots.** Intraspecific variation, as illustrated here, is very common in *D. falleni*. a, Adult abdomen. b-d, Adult abdominal pigment spots developing from stripe repression (arrows).

# **Materials and Methods**

## **Molecular procedures**

*In situ* hybridizations were carried out with species-specific RNA probes, as described in<sup>12</sup>, but with abdomens cut into halves and cleaned from the internal organs. At least three positive pupae were observed for each result shown. Additional images for verification purposes are provided in Extended Data Figs. 6-16. Immunohistochemistry for the Y protein in abdomens was performed according to<sup>15</sup>, with abdomens cut in half and cleaned with 1X PBS. *D. guttifera* CRMs were identified and tested in *D. guttifera* according to<sup>12</sup> and in *D. melanogaster* as described in<sup>23</sup>. Transgenic experiments were performed as outlined in<sup>32</sup>. Pupal stages were identified according to<sup>33</sup>.

## ***Drosophila* stocks**

All fly stocks were a kind gift from the Sean B. Carroll Laboratory (University of Wisconsin - Madison) and were cultured at room temperature. We used the *D. melanogaster* fly strain VK00006 (cytogenic location 19E7), the *D. guttifera* stock no.15130–1971.10, and the *D. deflecta* stock no. 15130-2018.00 for gene expression and transgenic analyses.

## **PCR primer sequences**

We used the following primers to amplify the CRM sequences:

(iii) *gut y spot* CRM: Fwd: 5'-CAGCTGCGGTTGAGTACGAC-3' and Rvs: 5'-GCCAACTCGACGGGAATTC-3'. Restriction sites: KpnI and SacII.

(iv) *def y spot* CRM: Fwd: 5'-CAGCTGCTGCGGTTTCAGTAG-3' and Rvs: 5'-GCTAGACACACGTTGGTTTGCT-3'. Restriction sites: KpnI and SacII.

- 205 (v) *gut y spot* CRM sub-fragment #1: Fwd: 5'-CAGCTGCGGTTGAGTACGAC-3' and Rvs: 5'-  
206 ACTGAATCTGATTTTCGGCTCG-3'. Restriction sites: KpnI and SacII.
- 207 (vi) *gut y spot* CRM sub-fragment #2: Fwd: 5'-AGTTAATCGCCAGTCAATAATGGC-3' and  
208 Rvs: 5'-GAATTCCCGTCGAGTTGGC-3'. Restriction sites: KpnI and SacII.
- 209 (vii) *gut y spot* CRM sub-fragment #3: Fwd: 5'-CAGCTGCGGTTGAGTACGAC-3' and Rvs:  
210 5'-GCCATTATTGACTGGCGATTAAC-3'. Restriction sites: KpnI and SacII.
- 211 (viii) *gut y spot* CRM sub-fragment #4: Fwd: 5'-AAATGAAGCTCAGTGAGCCGC-3' and Rvs:  
212 5'-ACTGAATCTGATTTTCGGCTCG-3'. Restriction sites: KpnI and SacII.
- 213 (ix) *gut y spot* CRM sub-fragment #5: Fwd: 5'-AGCATCTGAACTTAAACGCCG-3' and Rvs:  
214 5'-GAATTCCCGTCGAGTTGGC-3'. Restriction sites: KpnI and SacII.
- 215 (x) *gut y spot* CRM sub-fragment #6: Fwd: 5'-CAGCTGCGGTTGAGTACGAC-3' and Rvs: 5'-  
216 CAGCGATATTAATTTTTTATTCAATGG-3'. Restriction sites: KpnI and SacII.
- 217 (xi) *gut y spot* CRM sub-fragment #7(*gut y core stripe* CRM): Fwd: 5'-  
218 AAATGAAGCTCAGTGAGCCGC-3' and Rvs: 5'-GCGATTTGTTTGTCAAGTCAAC-3'.  
219 Restriction sites: KpnI and SacII.
- 220 (xii) *gut y spot* CRM sub-fragment #8: Fwd: 5'-AAATGAAGCTCAGTGAGCCGC-3' and Rvs:  
221 5'-GTTGACTTGACAAACAAATCGC-3'. Restriction sites: KpnI and SacII.
- 222 (xiii) *def y spot* CRM sub-fragment #1: Fwd: 5'-CAGCTGCTGCGGTTTCAGTAG-3' and Rvs:  
223 5'-ATTGTCGCAGCTGCCTAACG-3'. Restriction sites: KpnI and SacII.
- 224 (xiv) *def y spot* CRM sub-fragment #2: Fwd: 5'-AACGAAGCTCACTGAGCTGC-3' and Rvs:  
225 5'-AGCAAACCAACGTGTGTCTAGC-3'. Restriction sites: KpnI and SacII.



- 226 (xv) *defy spot* CRM sub-fragment #3: Fwd: 5'-CAGCTGCTGCGGTTTCAGTAG-3' and Rvs:  
227 5'-GTTAAAAGCAGCCAGTTGGCC-3'. Restriction sites: KpnI and SacII.
- 228 (xvi) *defy spot* CRM sub-fragment #4: Fwd: 5'-CAAAGAATCGAATTCGGAGACAG-3' and  
229 Rvs: 5'-ATTGTCGCAGCTGCCTAACG-3'. Restriction sites: KpnI and SacII. (Clone name: *def*  
230 *y* 1.1C2)
- 231 (xvii) *defy spot* CRM sub-fragment #5: Fwd: 5'-GAATGAGATTCGTTAGGCAGC-3' and Rvs:  
232 5'-AGCAAACCAACGTGTGTCTAGC-3'. Restriction sites: KpnI and SacII.
- 233 (xviii) *defy spot* CRM sub-fragment #6: Fwd: 5'-CAGCTGCTGCGGTTTCAGTAG-3' and Rvs:  
234 5'-TTCAACGGATATTCGTTCAATTTC-3'. Restriction sites: KpnI and SacII.
- 235 (xix) *defy spot* CRM sub-fragment #7 (*defy core stripe* CRM): Fwd: 5'-  
236 CAAAGAATCGAATTCGGAGACAG-3' and Rvs: 5'-GTCAGGCAATGTAAATGTTGTCG-  
237 3'. Restriction sites: KpnI and SacII.
- 238 (xx) *defy spot* CRM sub-fragment #8: Fwd: 5'-AACGAAGCTCACTGAGCTGC-3' and Rvs:  
239 5'-ATTGTCGCAGCTGCCTAACG-3'. Restriction sites: KpnI and SacII.
- 240 These forward and reverse primer sequences do not include restriction sites.

# ***D. guttifer* wingless (wg)**

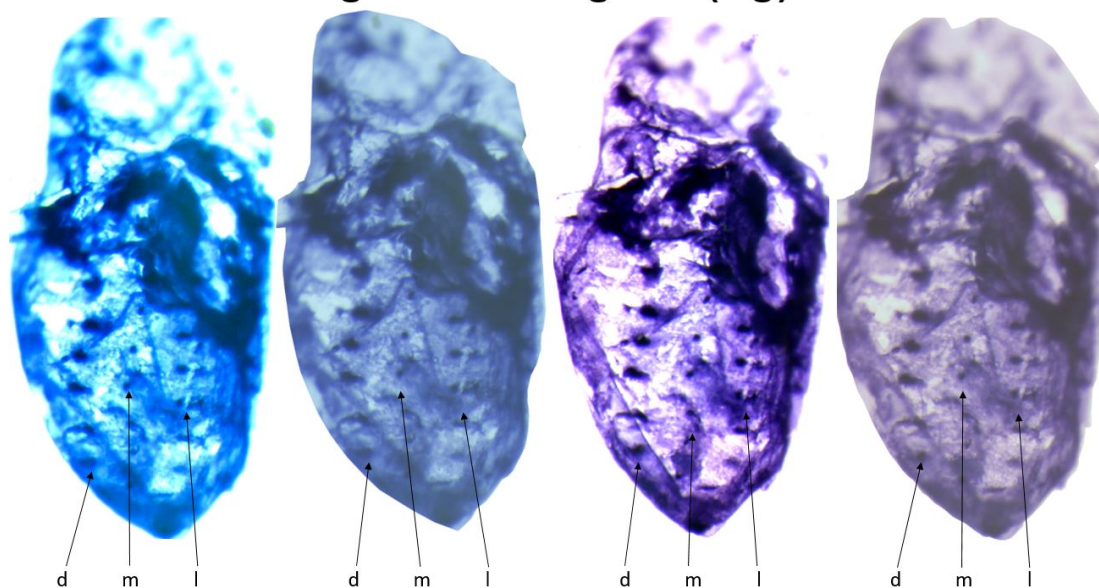

241

242 **Extended Data Fig. 6: One *D. guttifer* pupa stained with a *wg* probe. d = dorsal,**

243 m = median, l = lateral row of spots. Different image manipulations shown.

# ***D. guttifer* wingless (wg)**

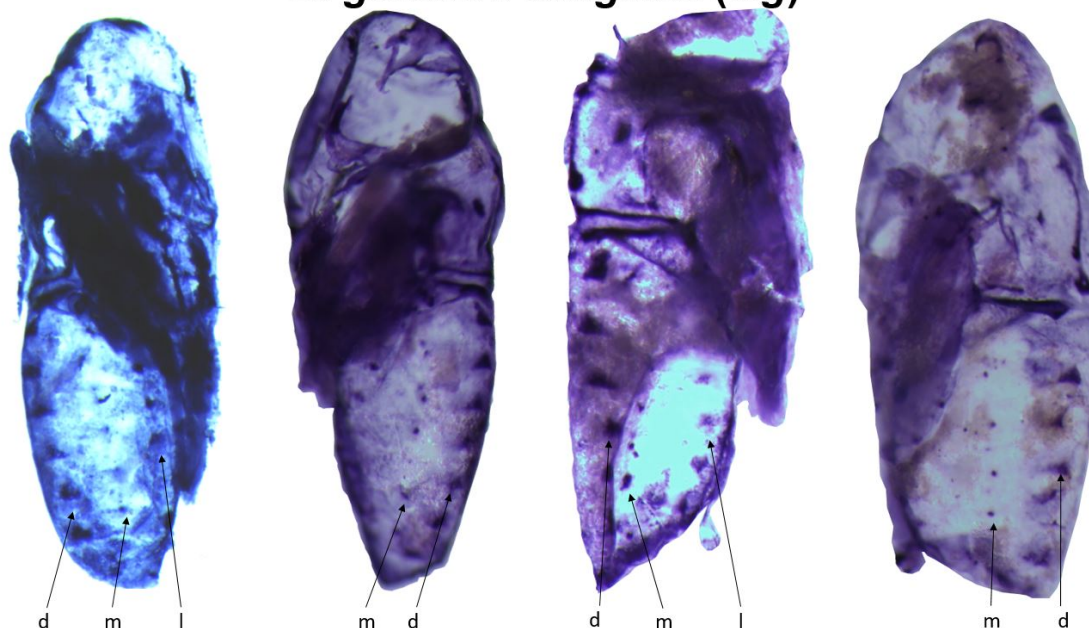

244

245 **Extended Data Fig. 7: *D. guttifer* pupae stained with a *wg* probe. d = dorsal, m = median,**

246 l = lateral row of spots.

# ***D. guttifer* wingless (wg)**

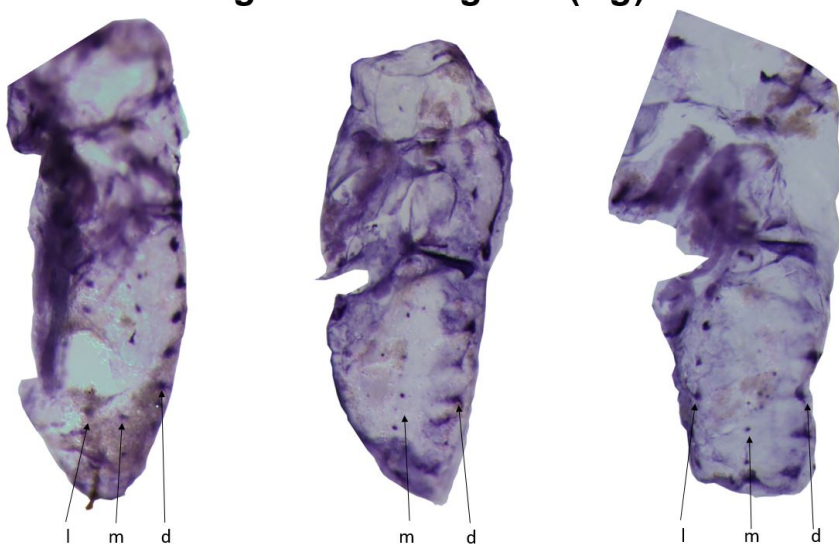

**Extended Data Fig. 8: *D. guttifer* pupae stained with a *wg* probe. d = dorsal, m = median, l = lateral row of spots.**

# ***D. guttifer* wingless (wg)**

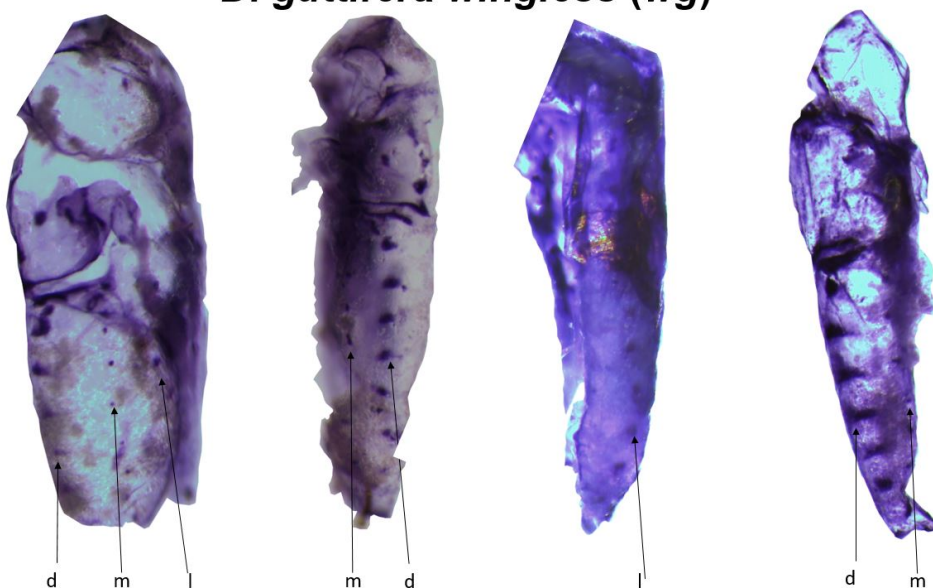

**Extended Data Fig. 9: *D. guttifer* pupae stained with a *wg* probe. d = dorsal, m = median, l = lateral row of spots.**

# ***D. guttifer* abdominal A (abd-A)**

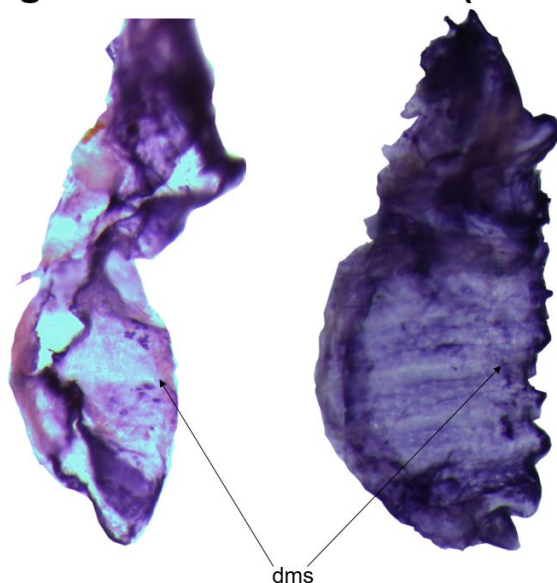

254  
255 **Extended Data Fig. 10: *D. guttifer* pupae stained with an *abd-A* probe. dms = dorsal midline**  
256 shade.

# ***D. guttifer* decapentaplegic (dpp)**

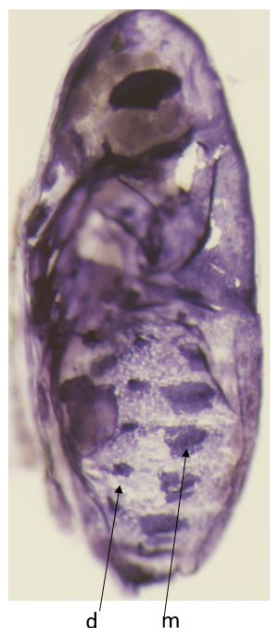

257  
258 **Extended Data Fig. 11: *D. guttifer* pupa stained with a *dpp* probe. d = dorsal, m = median**  
259 row of spots.



# ***D. guttifera* hedgehog (*hh*)**

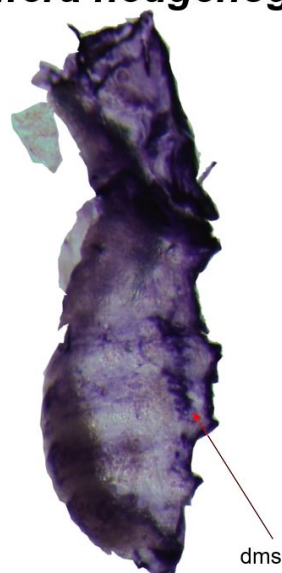

260

261 **Extended Data Fig. 12: *D. guttifera* pupa stained with a *hh* probe. dms = dorsal midline**

262 shade.

# ***D. guttifera* zerknult (*zen*)**

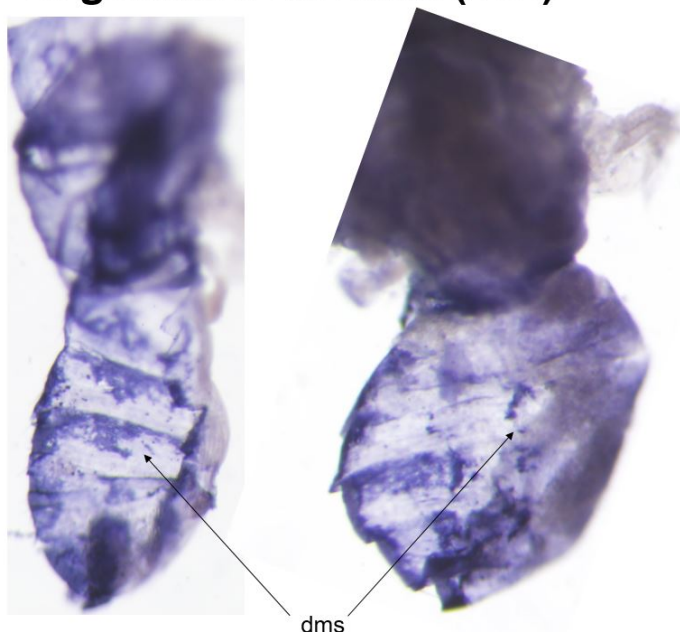

263

264 **Extended Data Fig. 13: *D. guttifera* pupae stained with a *zen* probe. dms = dorsal midline**

265 shade.

# ***D.deflecta wingless (wg)***

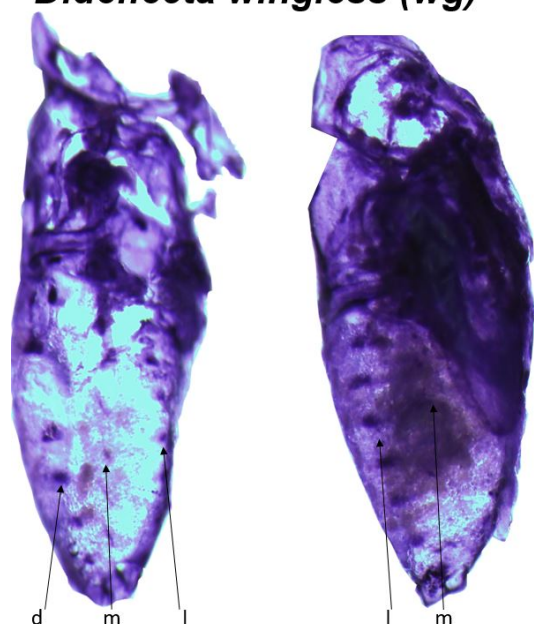

**Extended Data Fig. 14: *D. deflecta* pupae stained with a *wg* probe. d = dorsal, m = median, l = lateral row of spots.**

# ***D.deflecta yellow (y)***

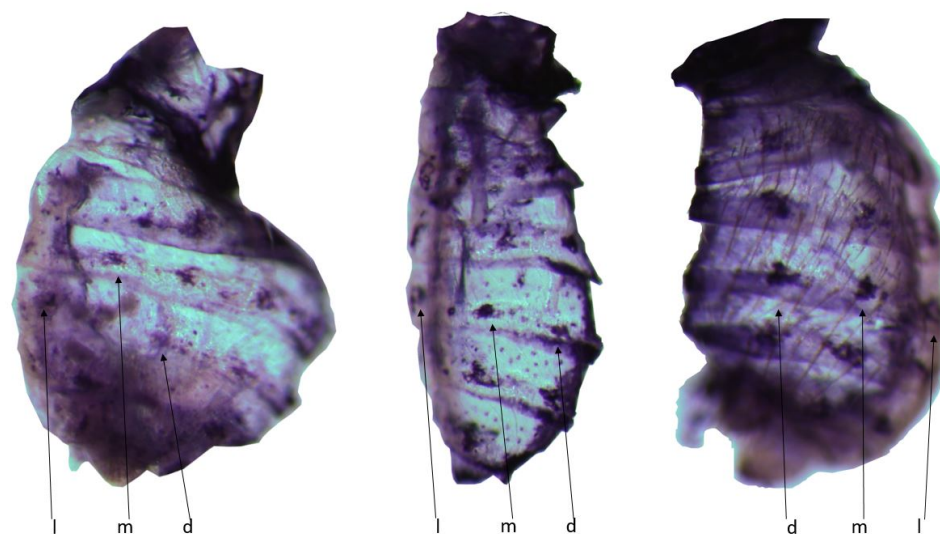

**Extended Data Fig. 15: *D. deflecta* pupae stained with a *y* probe. d = dorsal, m = median, l = lateral row of spots.**



# ***D.melanogaster* yellow (y)**

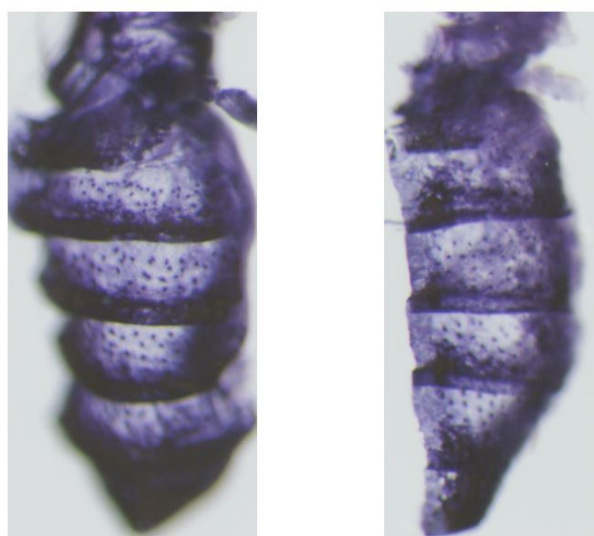

Male

Female

**Extended Data Fig. 16: *D. melanogaster* pupae stained with a y probe.**

## **Acknowledgements**

We thank Ryan Bensen, Abigail Meisel, Bridgette Rebbeck, and Jason Hu for technical assistance. This research was funded by NIH grant #1R15GM107801-01A1 to T.W.

## **Author Contributions**

K.K.B.R., M.S. and T.W. conceived and designed the experiments; K.K.B.R, P.M.E.N., T.E.S, E.B., P.P.K, A.McQ., E.M., A.A., A.N. and T.W. performed the experiments; K.K.B.R., S.M. and T.W. analyzed the data; T.W. obtained funding; K.K.B.R and T.W. wrote the paper; K.K.B.R, S.M., P.M.E.N., T.E.S., E.B., P.P.K., A.McQ., E.M., A.A., A.N. and T.W. edited the paper.

## Competing Financial Interests

The authors declare no competing financial interests.

## References

- 1 True, J. R. & Carroll, S. B. Gene co-option in physiological and morphological evolution. *Annu Rev Cell Dev Bi.* **18**, 53-80 (2002).
- 2 Carroll, S. B. Endless forms: the evolution of gene regulation and morphological diversity. *Cell* **101**, 577-580 (2000).
- 3 McGregor, A. P. *et al.* Morphological evolution through multiple *cis*-regulatory mutations at a single gene. *Nature* **448**, 587-U586, doi:10.1038/nature05988 (2007).
- 4 Shapiro, M. D. *et al.* Genetic and developmental basis of evolutionary pelvic reduction in threespine sticklebacks. *Nature* **428**, 717-723 (2004).
- 5 Rubinstein, M. & de Souza, F. S. Evolution of transcriptional enhancers and animal diversity. *Philos Trans R Soc Lond B Biol Sci.* **368**, 20130017, doi:10.1098/rstb.2013.0017 (2013).
- 6 McKay, D. J., Estella, C. & Mann, R. S. The origins of the *Drosophila* leg revealed by the *cis*-regulatory architecture of the Distalless gene. *Development* **136**, 61-71, doi:10.1242/dev.029975 (2009).
- 7 Werner, T., Steenwinkel, T., Jaenike, J. (2018) *Drosophilids of the Midwest and Northeast*. (Version 2) J. Robert Van Pelt and John and Ruanne Opie Library, Michigan Technological University. Houghton, Michigan. ISBN: 978-1-7326524-0-8 (E-Book, 345 pages) <https://digitalcommons.mtu.edu/oabooks/1/>

- 307 8 Bray, M. J., Werner, T. & Dyer, K. A. Two genomic regions together cause dark  
308 abdominal pigmentation in *Drosophila tenebrosa*. *Heredity* **112**, 454-462,  
309 doi:10.1038/hdy.2013.124 (2013).
- 310 9 True, J. R. Insect melanism: the molecules matter. *Trends Ecol Evol.* **18**, 640-647,  
311 doi:DOI 10.1016/j.tree.2003.09.006 (2003).
- 312 10 Wittkopp, P. J., Vaccaro, K. & Carroll, S. B. Evolution of *yellow* gene regulation and  
313 pigmentation in *Drosophila*. *Curr Biol.* **12**, 1547-1556 (2002).
- 314 11 Riedel, F., Vorkel, D. & Eaton, S. Megalin-dependent *yellow* endocytosis restricts  
315 melanization in the *Drosophila* cuticle. *Development* **138**, 149-158,  
316 doi:10.1242/dev.056309 (2011).
- 317 12 Werner, T., Koshikawa, S., Williams, T. M. & Carroll, S. B. Generation of a novel wing  
318 colour pattern by the Wingless morphogen. *Nature* **464**, 1143-1148, doi:nature08896 [pii]  
319 10.1038/nature08896 (2010).
- 320 13 Gibert, J. M., Mouchel-Vielh, E. & Peronnet, F. Modulation of *yellow* expression  
321 contributes to thermal plasticity of female abdominal pigmentation in *Drosophila*  
322 *melanogaster*. *Sci Rep.* **7**, 43370, doi:10.1038/srep43370 (2017).
- 323 14 Jeong, S., Rokas, A. & Carroll, S. B. Regulation of body pigmentation by the Abdominal-  
324 B Hox protein and its gain and loss in *Drosophila* evolution. *Cell* **125**, 1387-1399,  
325 doi:S0092-8674(06)00760-4 [pii]10.1016/j.cell.2006.04.043 (2006).
- 326 15 Gompel, N., Prud'homme, B., Wittkopp, P. J., Kassner, V. A. & Carroll, S. B. Chance  
327 caught on the wing: *cis*-regulatory evolution and the origin of pigment patterns in  
328 *Drosophila*. *Nature* **433**, 481-487 (2005).

329 16 Prud'homme, B. *et al.* Repeated morphological evolution through *cis*-regulatory changes  
330 in a pleiotropic gene. *Nature* **440**, 1050-1053 (2006).

331 17 Arnoult, L. *et al.* Emergence and diversification of fly pigmentation through evolution of  
332 a gene regulatory module. *Science* **339**, 1423-1426, doi:10.1126/science.1233749  
333 339/6126/1423 [pii] (2013).

334 18 Ordway, A. J., Hancuch, K. N., Johnson, W., Williams, T. M. & Rebeiz, M. The  
335 expansion of body coloration involves coordinated evolution in *cis* and *trans* within the  
336 pigmentation regulatory network of *Drosophila prostipennis*. *Dev Biol.* **392**, 431-440,  
337 doi:10.1016/j.ydbio.2014.05.023 (2014).

338 19 Camino, E. M. *et al.* The Evolutionary Origination and Diversification of a Dimorphic  
339 Gene Regulatory Network through Parallel Innovations in *cis* and *trans*. *Plos Genet.* **11**,  
340 doi:ARTN e1005136 10.1371/journal.pgen.1005136 (2015).

341 20 Nijhout, H. F. & Wray, G. A. Homologies in the Color Patterns of the Genus *Heliconius*  
342 (Lepidoptera, Nymphalidae). *Biol J Linn Soc.* **33**, 345-365, doi:DOI 10.1111/j.1095-  
343 8312.1988.tb00449.x (1988).

344 21 Sekimura, T. & Nijhout, H. F. *Diversity and Evolution of Butterfly Wing Patterns: An*  
345 *Integrative Approach.* (Springer, 2017).

346 22 Rogers, W. A. *et al.* A survey of the *trans*-regulatory landscape for *Drosophila*  
347 *melanogaster* abdominal pigmentation. *Dev Biol* **385**, 417-432,  
348 doi:10.1016/j.ydbio.2013.11.013 (2014).

349 23 Williams, T. M. *et al.* The regulation and evolution of a genetic switch controlling  
350 sexually dimorphic traits in *Drosophila*. *Cell* **134**, 610-623 (2008).

351 24 Geissler, K. & Zach, O. Pathways involved in *Drosophila* and human cancer  
352 development: the Notch, Hedgehog, Wingless, Runt, and Trithorax pathway. *Ann*  
353 *Hematol.* **91**, 645-669, doi:10.1007/s00277-012-1435-0 (2012).

354 25 Miyagi, R., Akiyama, N., Osada, N. & Takahashi, A. Complex patterns of *cis*-regulatory  
355 polymorphisms in *ebony* underlie standing pigmentation variation in *Drosophila*  
356 *melanogaster*. *Mol Ecol.* **24**, 5829-5841, doi:10.1111/mec.13432 (2015).

357 26 Dion, W. A., Shittu, S. O., Steenwinkel, T. E., Raja, K. K. B., Kokate, P. P., & Werner,  
358 T. From simplicity to complexity: The gain or loss of spot rows underlies the  
359 morphological diversity of three *Drosophila* species. *bioRxiv*.  
360 doi: <https://doi.org/10.1101/2020.04.03.024778> (2020).

361 27 Martin, A. & Reed, R. D. Wnt signaling underlies evolution and development of the  
362 butterfly wing pattern symmetry systems. *Dev Biol.* **395**, 367-378,  
363 doi:10.1016/j.ydbio.2014.08.031 (2014).

364 28 Ozsu, N., Chan, Q. Y., Chen, B., Das Gupta, M. & Monteiro, A. Wingless is a positive  
365 regulator of eyespot color patterns in *Bicyclus anynana* butterflies. *Dev Biol.* **429**, 177-  
366 185, doi:10.1016/j.ydbio.2017.06.030 (2017).

367 29 Futahashi, R., Banno, Y. & Fujiwara, H. Caterpillar color patterns are determined by a  
368 two-phase melanin gene prepatterning process: new evidence from *tan* and *laccase2*.  
369 *Evol Dev.* **12**, 157-167, doi:EDE401 [pii] 10.1111/j.1525-142X.2010.00401.x (2010).

370 30 Miyazaki, S. *et al.* Sexually dimorphic body color is regulated by sex-specific Expression  
371 of *yellow* gene in ponerine ant, *Diacamma* sp. *Plos One* **9**, doi:ARTN e92875  
372 10.1371/journal.pone.0092875 (2014).

373 31 Turing, A. M. The chemical basis of morphogenesis. *Phil Trans R Soc B.* **237**, 37-72  
374 (1952).

- 375 32 Shittu, M., Steenwinkel, T., Koshikawa, S. & Werner, T. The making of transgenic  
376 *Drosophila guttifera*. *Preprints*. 2020040120 (doi: 10.20944/preprints202004.0120.v1)  
377 (2020).
- 378 33 Fukutomi, Y., Matsumoto, K., Agata, K., Funayama, N. & Koshikawa, S. Pupal  
379 development and pigmentation process of a polka-dotted fruit fly, *Drosophila guttifera*  
380 (Insecta, Diptera). *Dev Genes Evol* **227**, 171-180 (2017).



**a**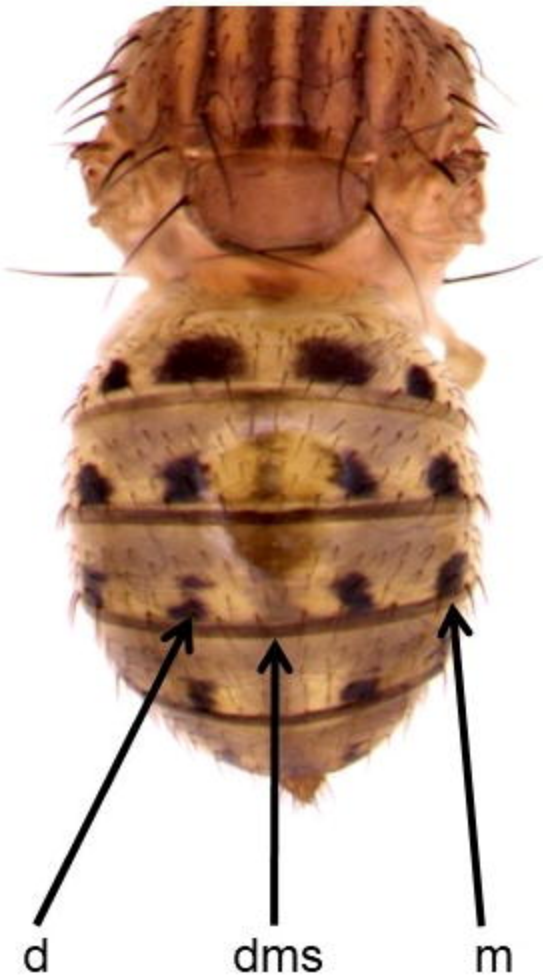**b**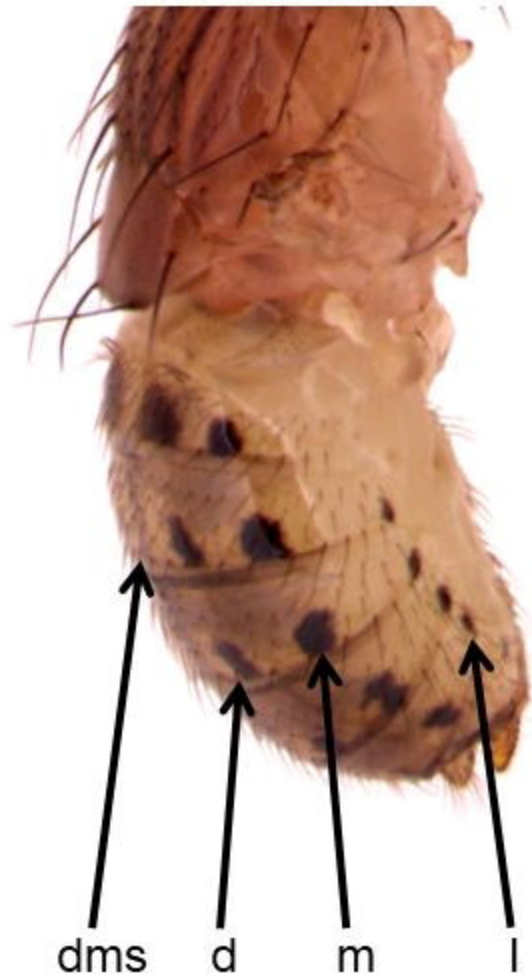**c**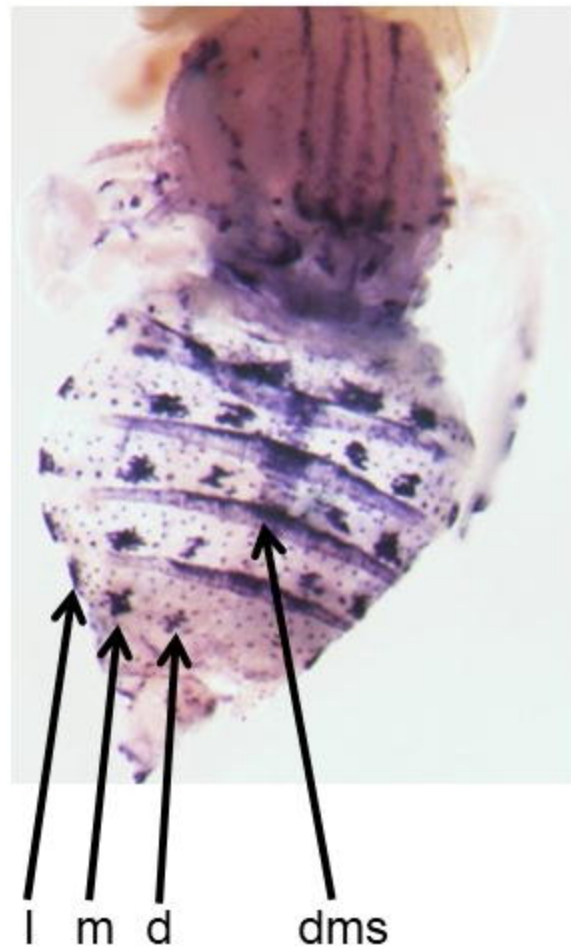**d**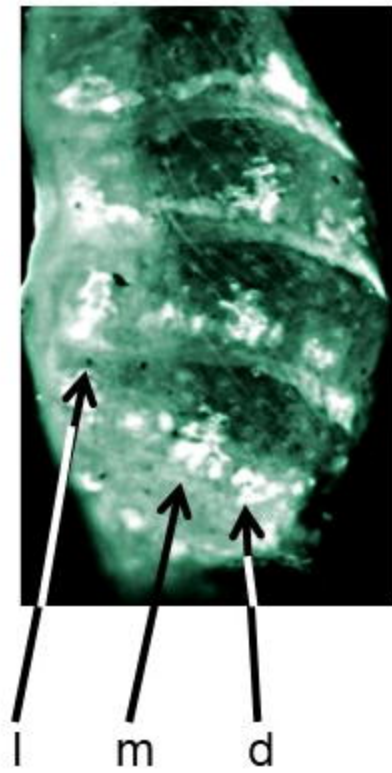



a

b

c

d

e

f

g

h

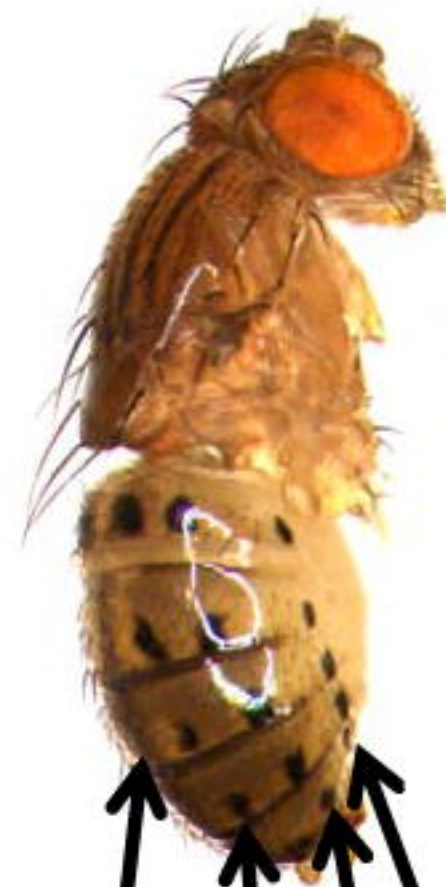

dms d m l

Adult

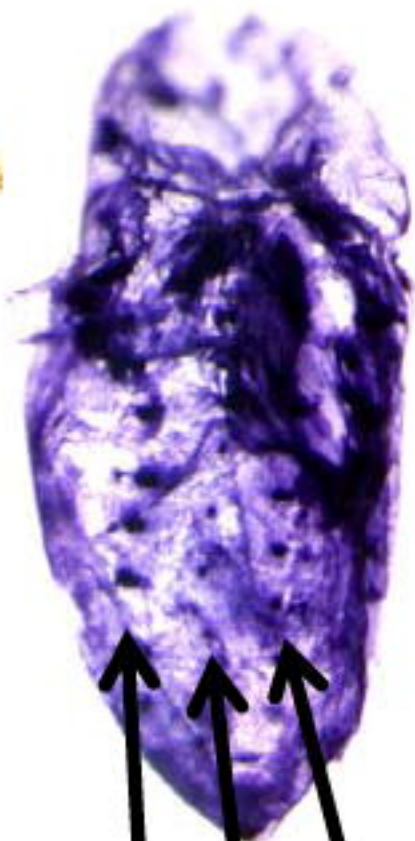

d m l

*wg*

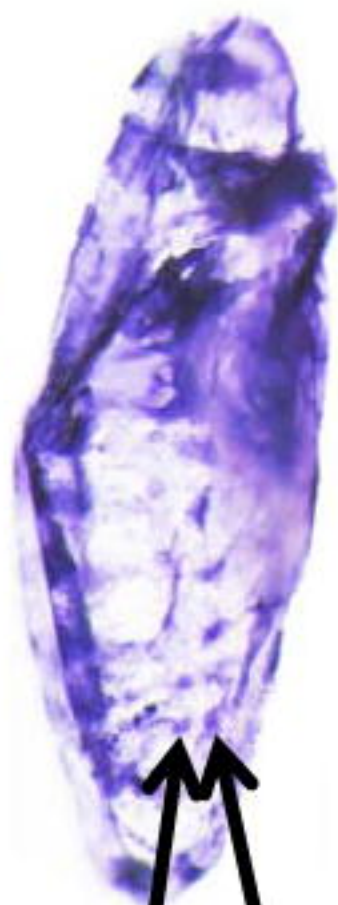

d m

*dpp*

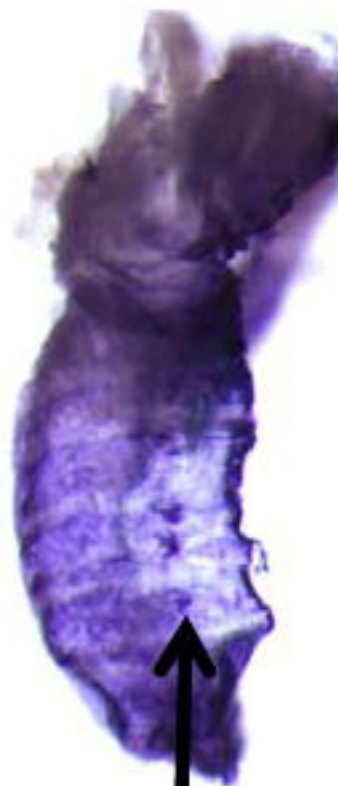

l

*abdA*

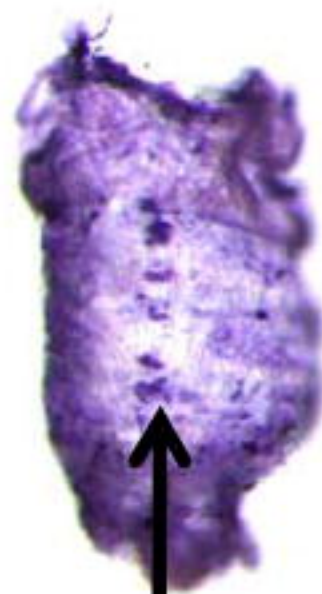

dms

*abdA*

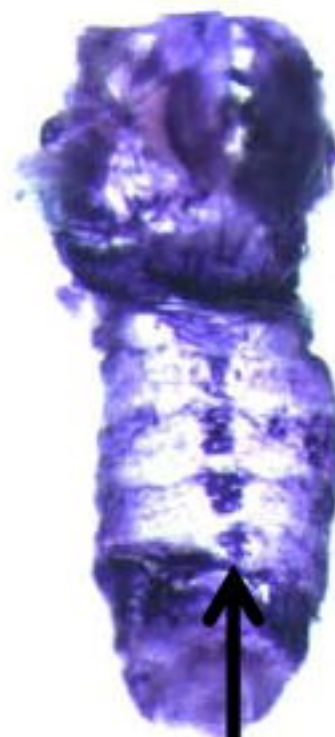

dms

*hh*

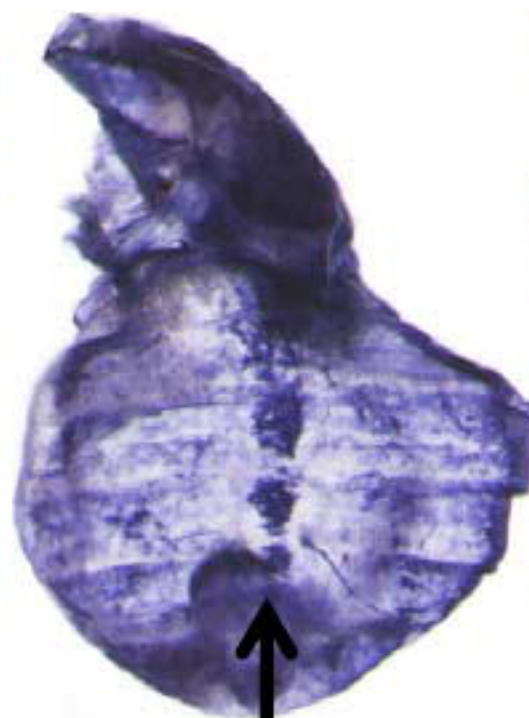

dms

*zen*

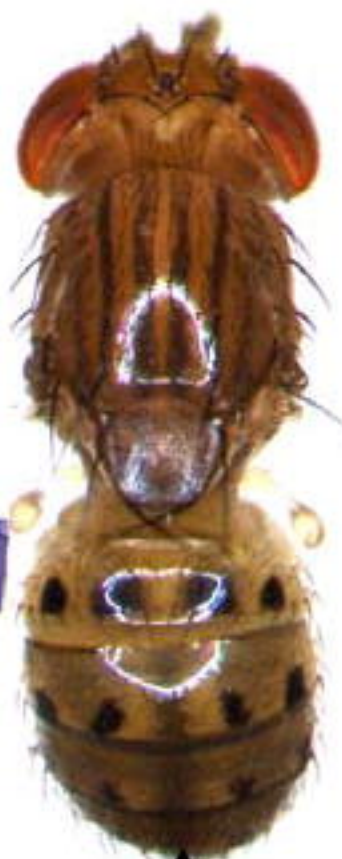

dms

Adult

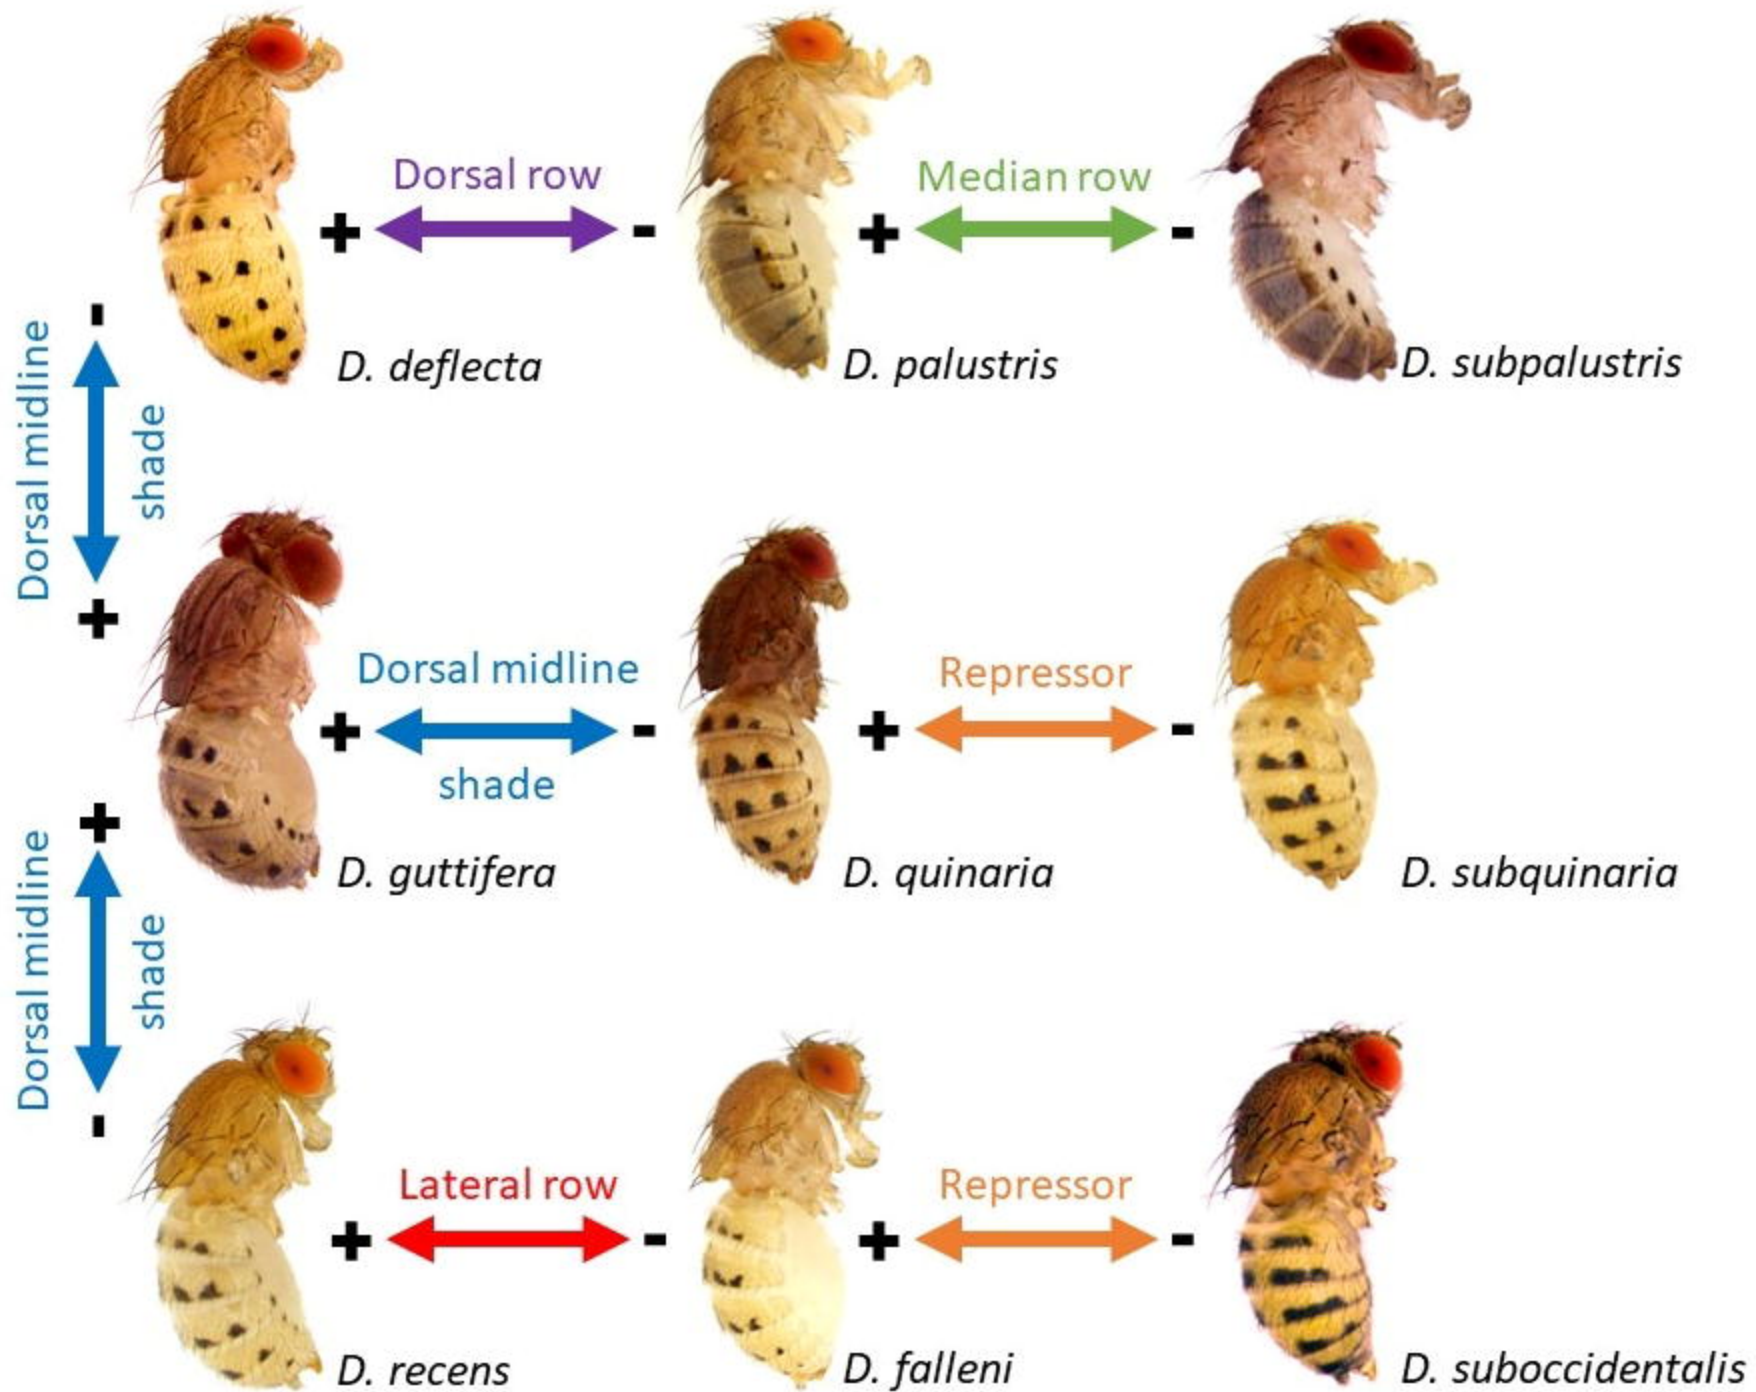



**a**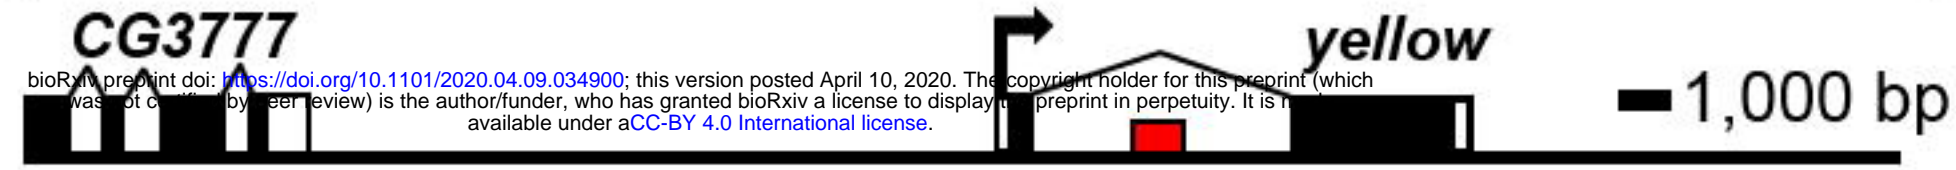**b**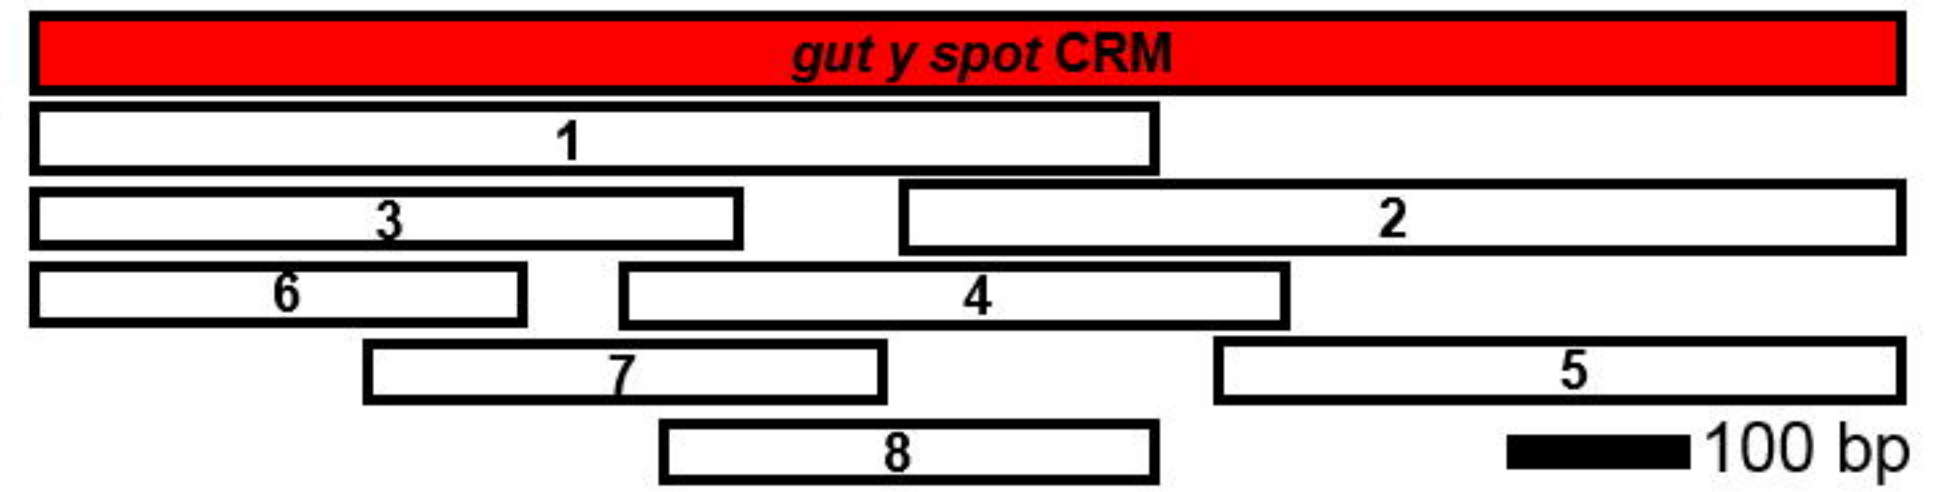**c**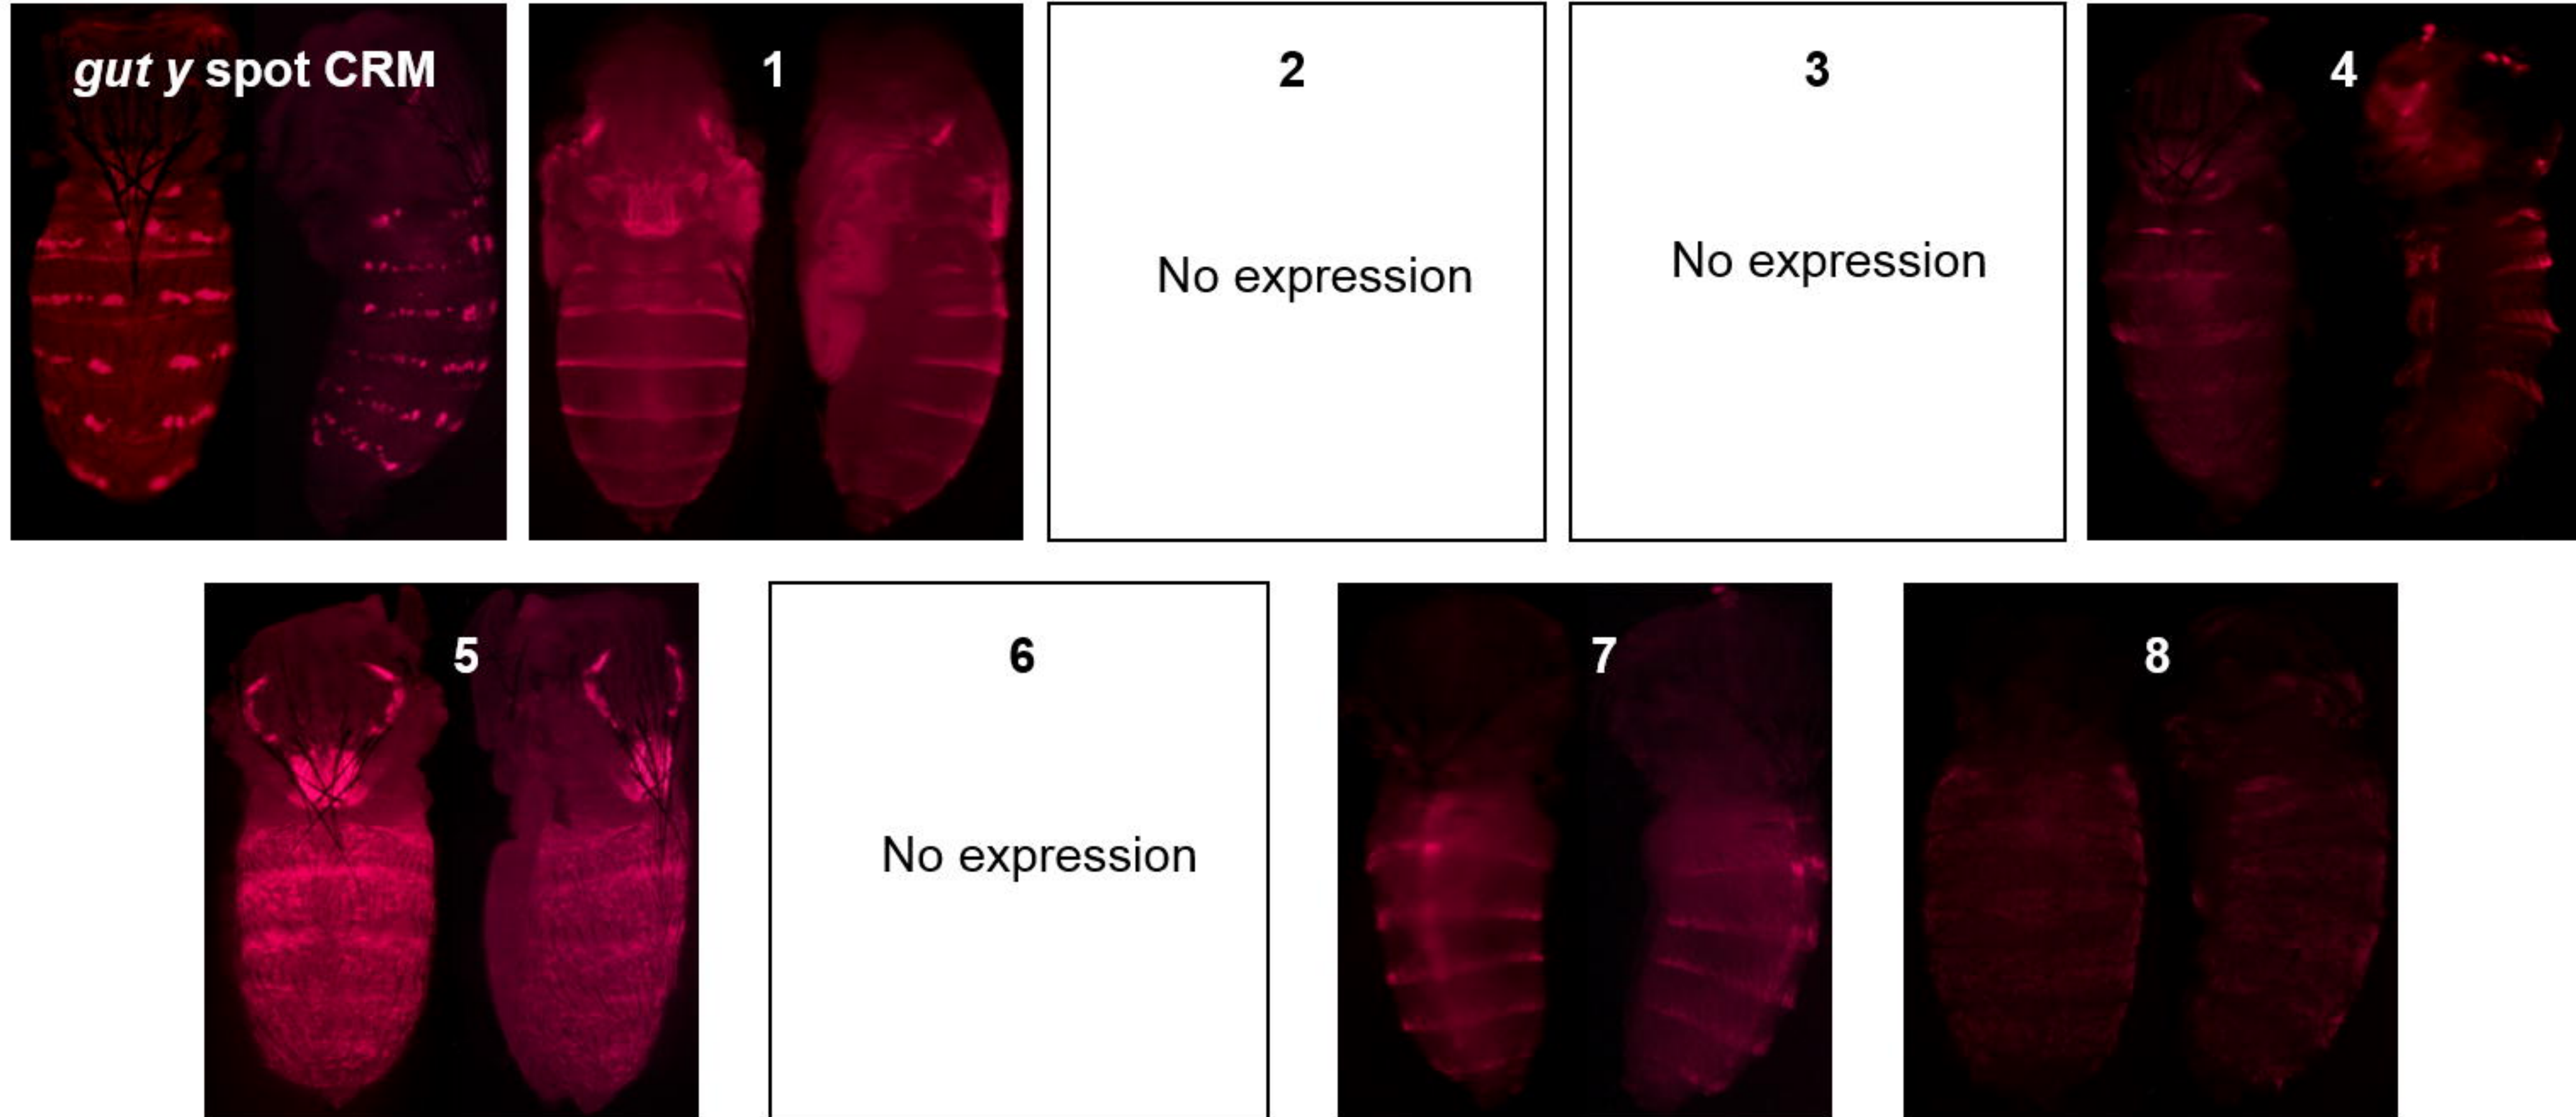

Source: https://www.biorxiv.org/content/10.1101/2020.04.09.034900v1.full.pdf
